# Supplementary material for: Development and Application of a Purification Method for the Determination of Three EDCs Isotopes in Sediments and Water
Source: MDPI journal article supplement (doi:10.3390/su15118583), 2023-05-25
Supplement: s1 [file s1]

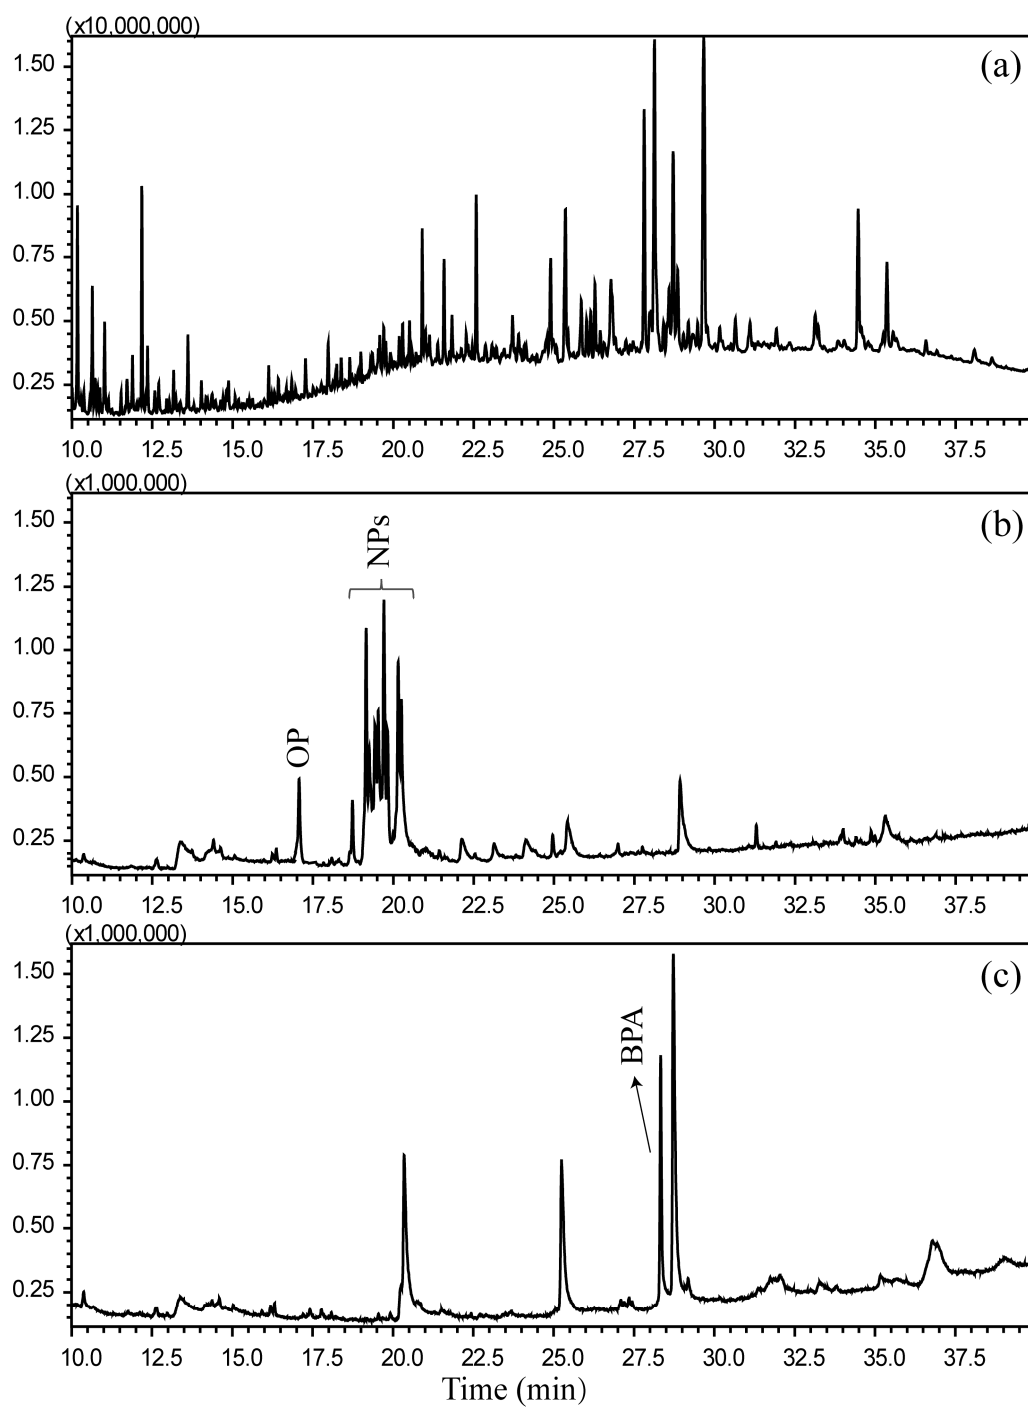

**Figure S1.** Full scan GC/MS chromatograms of samples after each clean-up step: (a) step 2; (b) step 3 eluent A; (c) step 3 eluent B.

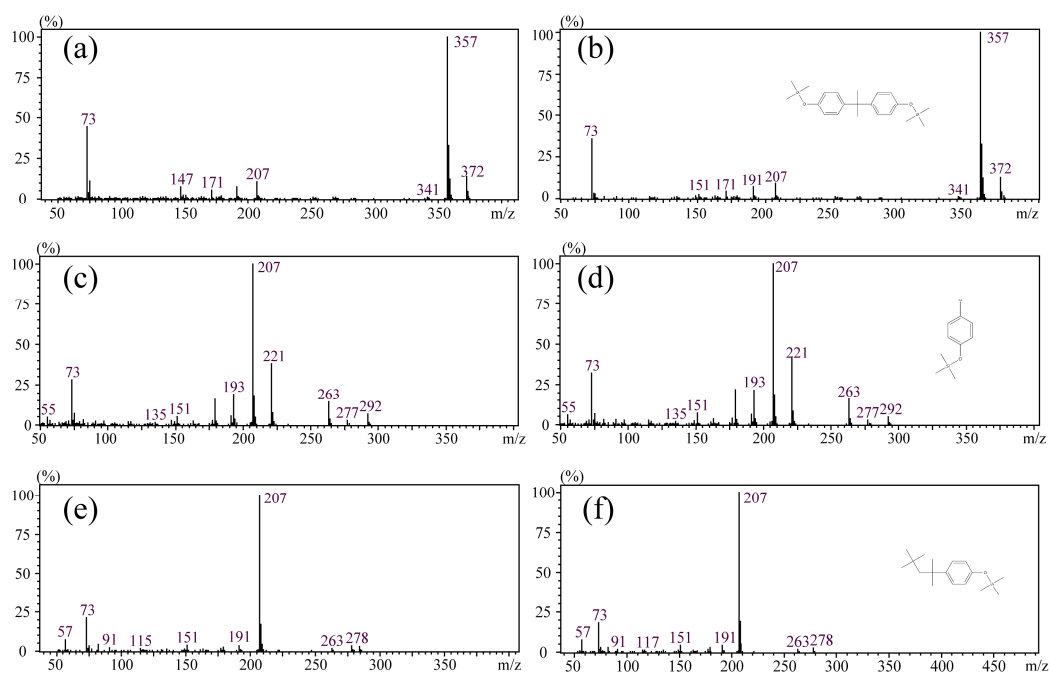

**Figure S2.** Mass spectrogram of BPA (a), NPs (c), and OP (e) versus standards (b, d, f).
